# Supplementary material
Source: bioRxiv or medRxiv preprint supplement (https://www.biorxiv.org/highwire/filestream/13580/field_highwire_adjunct_files/5/049478-6.pdf)

# Supplementary Figure 5

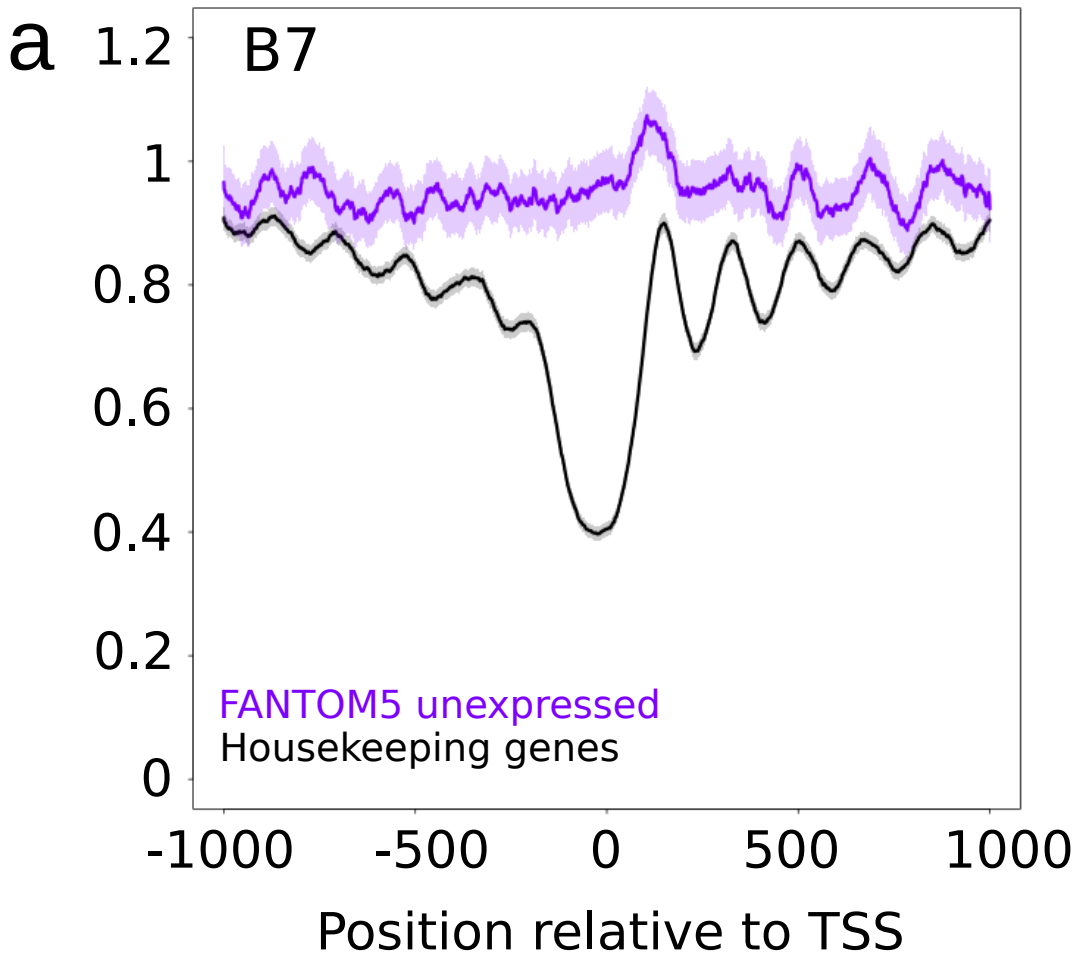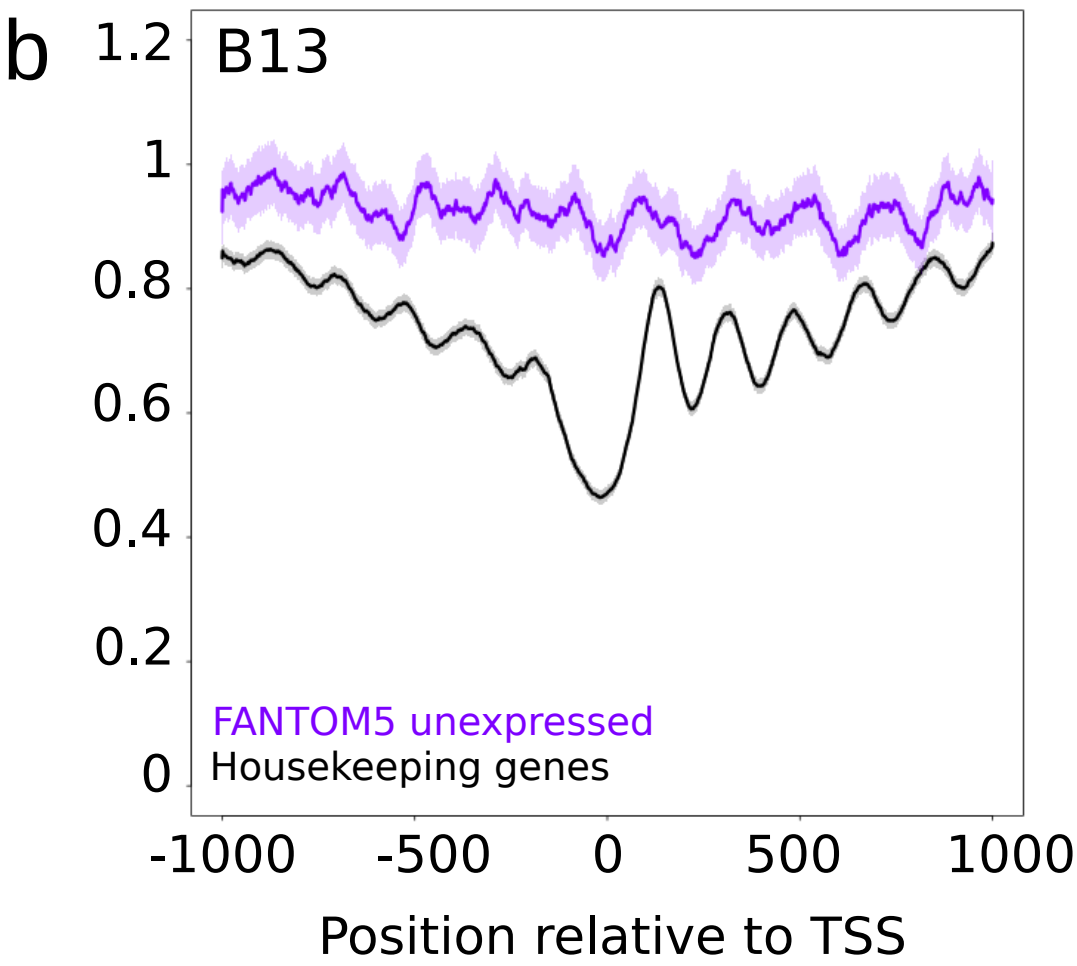

Supplement: Supplementary file [file 049478-6.pdf]
